# Supplementary material for: Environmental and Genetic Risk Factors in Developmental Dysplasia of the Hip for Early Detection of the Affected Population
Source: MDPI journal article supplement (doi:10.3390/diagnostics14090898), 2024-04-25
Supplement: s1 [file s1]

A

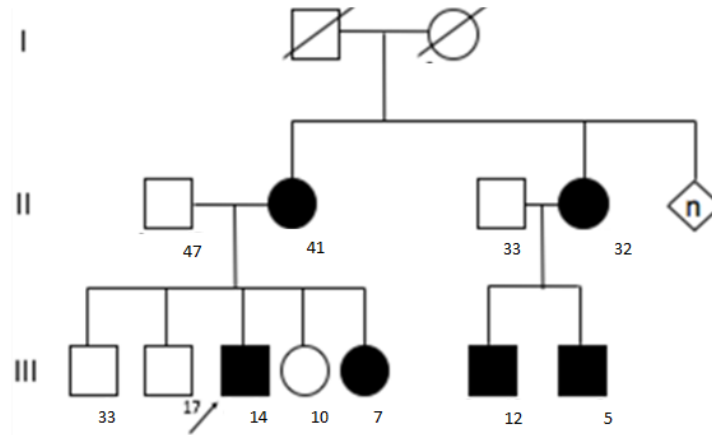

B

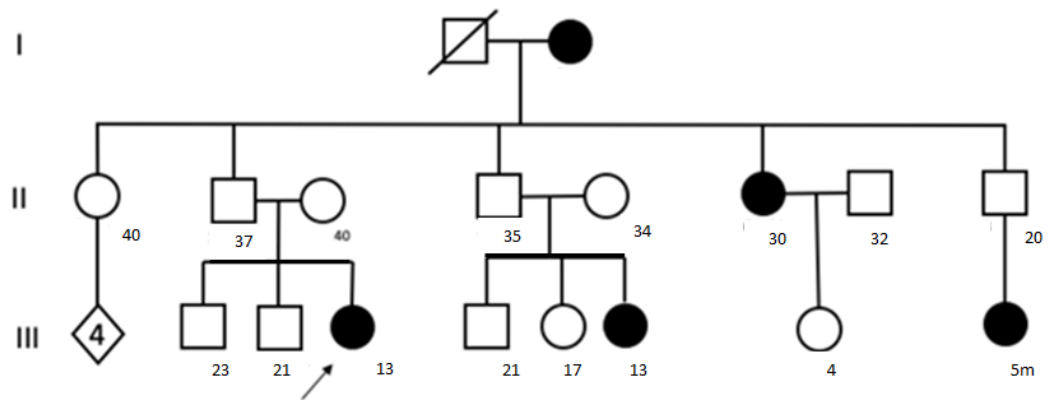

**Supplementary Figure S1.** Pedigrees showing DDH transmission. (A) Family resembling autosomal dominant inheritance. (B) Family with three affected generations, without a clear Mendelian pattern. Numbers represent age in years, except where the 'm' is shown, which represents months. Arrows represent individuals included in the study.
