# Supplementary material for: Environmental and Genetic Risk Factors in Developmental Dysplasia of the Hip for Early Detection of the Affected Population
Source: MDPI journal article supplement (doi:10.3390/diagnostics14090898), 2024-04-25
Supplement: s1 [file s1]

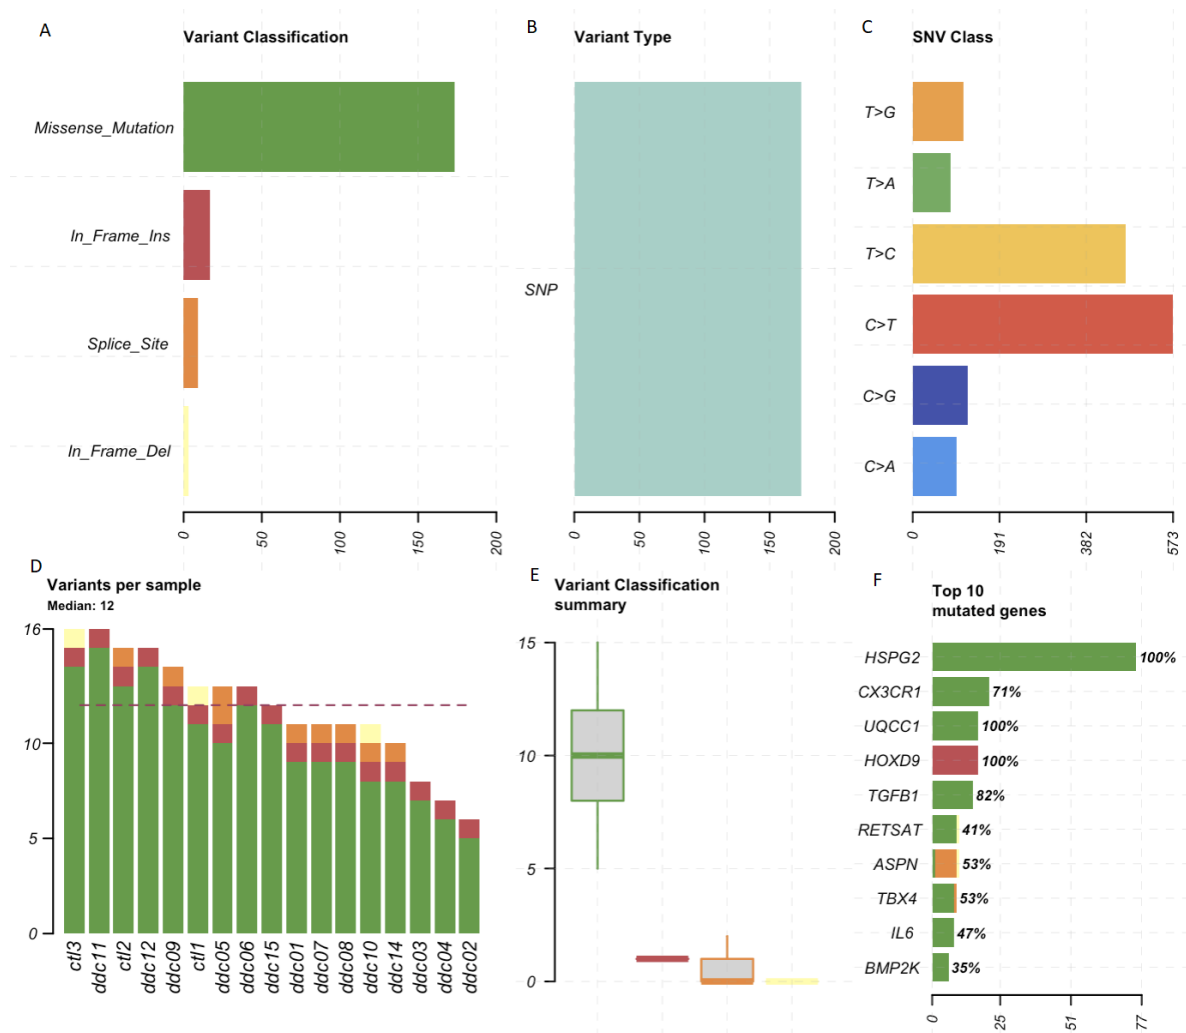

**Supplementary Figure S2.** SNV description. SNVs were classified based on the consequence at the RNA level (A) and type (B). SNVs class was also quantified, being C>T transition the most frequent (C). The median of variants per sample was 12 (D), missense variants were the most frequent (E). *HSPG2* presented the highest number of variants and variants were found in the 100% of the analyzed individuals (F). *ctl* corresponds to control. *Ddc* corresponds to the individuals with developmental dysplasia of the hip.
